# Supplementary material
Source: publisher site journal article supplement (https://www.dovepress.com/article/432743)
Supplement: Supplementary file 1 [file get_supplementary_file.php]

## Supplementary materials

**S1 data:** Questionnaire (English and Amharic version)

### English version

**Questionnaire for assessment of factors associated with diarrhea in Addis Ababa and Debre Berhan, Ethiopia.**

#### I. Patient information

1. Name of health facility \_\_\_\_\_
2. Identification number (card number) \_\_\_\_\_
3. Address \_\_\_\_\_

#### II. Socio-demographic information for under-five children

| S.No | Questions (for child and caregiver)       | Response                                                                                                               |
|------|-------------------------------------------|------------------------------------------------------------------------------------------------------------------------|
| 1.   | Age of the child                          | _____ (in month) or _____ (in year)                                                                                    |
| 2.   | Sex of the child                          | <input type="checkbox"/> Male <input type="checkbox"/> Female                                                          |
| 3.   | Relation of the respondent to the child?  | <input type="checkbox"/> Mother <input type="checkbox"/> Guardian (caregiver) <input type="checkbox"/> Other (specify) |
| 4.   | Age of the mother or guardian (caregiver) | _____                                                                                                                  |
| 5.   | Sex of the guardian (if not mother)       | <input type="checkbox"/> Male <input type="checkbox"/> Female                                                          |
| 6.   | How many person are in the household?     | _____                                                                                                                  |
| 7.   | How many children are in the family?      | _____                                                                                                                  |
| 8.   | Birth order                               | _____                                                                                                                  |

|     |                                             |                                                                                                                                                                                                       |
|-----|---------------------------------------------|-------------------------------------------------------------------------------------------------------------------------------------------------------------------------------------------------------|
| 9.  | Educational level of the mother or guardian | <input type="checkbox"/> Illiterate <input type="checkbox"/> Primary <input type="checkbox"/> Junior secondary<br><input type="checkbox"/> Preparatory <input type="checkbox"/> College or University |
| 10. | Educational level of the father             | <input type="checkbox"/> Illiterate <input type="checkbox"/> Primary <input type="checkbox"/> Junior secondary<br><input type="checkbox"/> Preparatory <input type="checkbox"/> College or university |
| 11. | Marital status of the mother or guardian    | <input type="checkbox"/> Single <input type="checkbox"/> Married <input type="checkbox"/> Other (specify)                                                                                             |
| 12. | Ethnic groups                               | <input type="checkbox"/> Amhara <input type="checkbox"/> Oromo <input type="checkbox"/> Tigray<br><input type="checkbox"/> Other (specify)                                                            |
| 13. | Occupation (Mother)                         | <input type="checkbox"/> Employed <input type="checkbox"/> Self-employed <input type="checkbox"/> Other (specify)                                                                                     |
|     | Occupation (Father)                         | <input type="checkbox"/> Employed <input type="checkbox"/> Self-employed <input type="checkbox"/> Other (specify)                                                                                     |
| 14. | Family income per month (in birr)           | _____                                                                                                                                                                                                 |

### III. Clinical features

|     |                              |                                                                                                                                |
|-----|------------------------------|--------------------------------------------------------------------------------------------------------------------------------|
| 15. | Time of illness started      | _____                                                                                                                          |
| 16. | Duration of diarrhea in days | _____                                                                                                                          |
| 17. | Stool frequency per day      | _____                                                                                                                          |
| 18. | Types of diarrhea            | <input type="checkbox"/> Watery <input type="checkbox"/> Mucoid <input type="checkbox"/> Bloody <input type="checkbox"/> Loose |
| 19. | Child dehydration status     | <input type="checkbox"/> Mild <input type="checkbox"/> Moderate <input type="checkbox"/> Severe <input type="checkbox"/> None  |
| 20. | Other clinical feature       |                                                                                                                                |
|     | Fever                        | <input type="checkbox"/> Yes <input type="checkbox"/> No                                                                       |
|     | Vomiting                     | <input type="checkbox"/> Yes <input type="checkbox"/> No                                                                       |
|     | Nausea                       | <input type="checkbox"/> Yes <input type="checkbox"/> No                                                                       |
|     | Increased thirst             | <input type="checkbox"/> Yes <input type="checkbox"/> No                                                                       |

|            |                      |                                                          |
|------------|----------------------|----------------------------------------------------------|
|            | Abdominal distension | <input type="checkbox"/> Yes <input type="checkbox"/> No |
|            | Other (specify)      | _____                                                    |
| <b>21.</b> | Previous treatment   | <input type="checkbox"/> Yes <input type="checkbox"/> No |
|            | If yes when?         | _____                                                    |

#### IV. Behavioural and health related factors related to under-five children

|            |                                                  |                                                                                                                                                                                                     |
|------------|--------------------------------------------------|-----------------------------------------------------------------------------------------------------------------------------------------------------------------------------------------------------|
| <b>22.</b> | How the child is cared daily at home?            | <input type="checkbox"/> With house worker <input type="checkbox"/> With mother<br><input type="checkbox"/> In day care <input type="checkbox"/> Other (specify)___                                 |
| <b>23.</b> | Feeding practice                                 | <input type="checkbox"/> Exclusive breast milk <input type="checkbox"/> Breast milk & solid food<br><input type="checkbox"/> Solid food only <input type="checkbox"/> Formula Milk                  |
| <b>24.</b> | Duration of breastfeeding                        | <input type="checkbox"/> < 1year <input type="checkbox"/> 1-2 years <input type="checkbox"/> > 2years                                                                                               |
| <b>25.</b> | Beginning age of supplementary feeding           | <input type="checkbox"/> < 6 moths <input type="checkbox"/> 6-12 moths <input type="checkbox"/> > 12 months                                                                                         |
| <b>26.</b> | What method do you use to feed your child?       | <input type="checkbox"/> Hand <input type="checkbox"/> Cup or spoon <input type="checkbox"/> Bottle                                                                                                 |
| <b>27.</b> | When do you wash your hand?                      | <input type="checkbox"/> Before food preparation <input type="checkbox"/> Before and after feeding<br><input type="checkbox"/> After latrine <input type="checkbox"/> After cleaning child's bottom |
| <b>28.</b> | What do you use for hand washing?                | <input type="checkbox"/> Soaps <input type="checkbox"/> Water only <input type="checkbox"/> Others                                                                                                  |
| <b>29.</b> | Do your child eat by himself/herself?            | <input type="checkbox"/> Yes <input type="checkbox"/> No                                                                                                                                            |
| <b>30.</b> | Do your child wash his/her hands before feeding? | <input type="checkbox"/> Yes <input type="checkbox"/> No                                                                                                                                            |
| <b>31.</b> | How the child dispose his/her                    | <input type="checkbox"/> With diaper <input type="checkbox"/> Latrine <input type="checkbox"/> Ground                                                                                               |

|     |                                                                 |                                                                                                                                                                                                                |
|-----|-----------------------------------------------------------------|----------------------------------------------------------------------------------------------------------------------------------------------------------------------------------------------------------------|
|     | feces?                                                          | <input type="checkbox"/> On baby potty (popo) <input type="checkbox"/> Under clothes                                                                                                                           |
| 32. | Where do you dispose your child's stool?                        | <input type="checkbox"/> Child use latrine <input type="checkbox"/> Put into latrine<br><input type="checkbox"/> Thrown in garbage <input type="checkbox"/> Buried <input type="checkbox"/> Left on the ground |
| 33. | Where do you dispose water used for washing your child's stool? | <input type="checkbox"/> Put in latrine <input type="checkbox"/> Thrown on the ground<br><input type="checkbox"/> Thrown in the garbage <input type="checkbox"/> No water used                                 |
| 34. | What vaccines your child has taken?                             | <input type="checkbox"/> Measles vaccine <input type="checkbox"/> Rota vaccine<br><input type="checkbox"/> Other (specify)                                                                                     |
| 35. | Nutritional status of the child                                 | <input type="checkbox"/> Under nutrition <input type="checkbox"/> Normal                                                                                                                                       |
| 36. | Is there any family member who travel abroad?                   | <input type="checkbox"/> Yes <input type="checkbox"/> No <input type="checkbox"/> If yes, when? _____                                                                                                          |

#### V. Environmental exposure variables

|     |                                                          |                                                                                                                                                                                                            |
|-----|----------------------------------------------------------|------------------------------------------------------------------------------------------------------------------------------------------------------------------------------------------------------------|
| 37. | House ownership                                          | <input type="checkbox"/> Private <input type="checkbox"/> Rented <input type="checkbox"/> Other (specify)                                                                                                  |
| 38. | Is a separate kitchen available?                         | <input type="checkbox"/> Yes <input type="checkbox"/> No                                                                                                                                                   |
| 39. | Ownership of latrine                                     | <input type="checkbox"/> Shared <input type="checkbox"/> Private <input type="checkbox"/> Public                                                                                                           |
| 40. | What types of toilet does the household mainly use?      | <input type="checkbox"/> Pit latrine with slab <input type="checkbox"/> Pit latrine without a slab or pour-flush latrine <input type="checkbox"/> Open field <input type="checkbox"/> Other (specify)_____ |
| 41. | Does hand washing facility is available near to latrine? | <input type="checkbox"/> Yes <input type="checkbox"/> No                                                                                                                                                   |
| 42. | How often is the latrine cleaned?                        | <input type="checkbox"/> Every time it is spoiled <input type="checkbox"/> Every day <input type="checkbox"/> 1-2 times a week <input type="checkbox"/> Not cleaned                                        |
| 43. | Where is your refuse container (bin) located?            | <input type="checkbox"/> Kept indoors <input type="checkbox"/> Outdoors <input type="checkbox"/> Do not own a bin                                                                                          |

|     |                                                                                        |                                                                                                                                                                                                                          |
|-----|----------------------------------------------------------------------------------------|--------------------------------------------------------------------------------------------------------------------------------------------------------------------------------------------------------------------------|
| 44. | Does your bin have a properly fitting lid?                                             | <input type="checkbox"/> Yes <input type="checkbox"/> No                                                                                                                                                                 |
| 45. | If your waste is not collected, how do you dispose of your waste?                      | <input type="checkbox"/> Burn <input type="checkbox"/> Burry <input type="checkbox"/> Dump <input type="checkbox"/> Other (specify)_____                                                                                 |
| 46. | How often is your waste/refuse collected by local authority?                           | <input type="checkbox"/> Daily <input type="checkbox"/> Weekly <input type="checkbox"/> Monthly <input type="checkbox"/> Never <input type="checkbox"/> Other (specify)_____                                             |
| 47. | Are there any domestic animals in the compound?                                        | <input type="checkbox"/> Yes <input type="checkbox"/> No                                                                                                                                                                 |
| 48. | What types of animals are in the house or the yard?                                    | <input type="checkbox"/> Cattle <input type="checkbox"/> Goats <input type="checkbox"/> Dog <input type="checkbox"/> Chicken <input type="checkbox"/> Other specify                                                      |
| 49. | Where do you mainly get your drinking water from?                                      | <input type="checkbox"/> Tape water <input type="checkbox"/> Packed water <input type="checkbox"/> Protected spring/well water <input type="checkbox"/> Unprotected spring/well water <input type="checkbox"/> Other ___ |
| 50. | Time to obtain drinking water (shift)                                                  | <input type="checkbox"/> No shift (daily) <input type="checkbox"/> Shift <input type="checkbox"/> if shift, how long? _____                                                                                              |
| 51. | What treatment of water do you use?                                                    | <input type="checkbox"/> Filtering <input type="checkbox"/> Boiling <input type="checkbox"/> None <input type="checkbox"/> Other (specify)_____                                                                          |
| 52. | What kind of utensils do you use for storing water?                                    | <input type="checkbox"/> Storage containers without lid<br><input type="checkbox"/> Storage containers with lid                                                                                                          |
| 53. | Do you always clean and empty the storage container before replacing with fresh water? | <input type="checkbox"/> Yes <input type="checkbox"/> No                                                                                                                                                                 |

**Data collector name** \_\_\_\_\_ **Date** \_\_\_\_\_ **Signature** \_\_\_\_\_

**Amharic version**

ዕድሜያቸው ከ5 ዓመት በታች በሆኑ ህጻናት ላይ ለሚከሰተው የተቅማጥ በሽታ ተያያዥነት ያላቸውን ነገሮች ለዳሰስ የተዘጋጀ መጥይቅ

**ሀ. የህፃናት (የታካሚው) መረጃ**

1. የህክምና አገልግሎት መስጫ ስም \_\_\_\_\_
2. የህመምተኛ መለያ ቁጥር (ካርድ ቁጥር) \_\_\_\_\_
3. አድራሻ \_\_\_\_\_

**ለ. ማህበራዊና የወሳኝ ኩነቶች መረጃ**

| ተ.ቁ. | መጥይቆች(ለህጻኑና አሳዳጊ)                    | ምላሽ                                                                                                                                                                                     |
|------|--------------------------------------|-----------------------------------------------------------------------------------------------------------------------------------------------------------------------------------------|
| 1.   | የህፃን/ኗ ዕድሜ                           | _____                                                                                                                                                                                   |
| 2.   | የህፃን/ኗ የታ                            | <input type="checkbox"/> ወንድ <input type="checkbox"/> ሴት                                                                                                                                |
| 3.   | ከህፃን/ኗ ጋር ያለው ዝምድና                   | <input type="checkbox"/> ወላጅ እናት <input type="checkbox"/> አሳዳጊ <input type="checkbox"/> ሌላ (ይጠቀስ)                                                                                       |
| 4.   | የህፃን/ኗ እናት/አሳዳጊ ዕድሜ                  | _____                                                                                                                                                                                   |
| 5.   | የህፃን/ኗ አሳዳጊ ጾታ (ከእናት ውጭ ከሆነ)         | <input type="checkbox"/> ወንድ <input type="checkbox"/> ሴት                                                                                                                                |
| 6.   | የቤተሰብ ብዛት ስንት ነው?                    |                                                                                                                                                                                         |
| 7.   | በቤት ውስጥ ምን ያህል ህጻናት አሉ?              | _____                                                                                                                                                                                   |
| 8.   | ስንተኛ ልጅ ነው?                          |                                                                                                                                                                                         |
| 9.   | የህጻኑ አሳዳጊ የትምህርት ደረጃ                 | <input type="checkbox"/> ያልተማረ <input type="checkbox"/> የመጀመሪያ ደረጃ<br><input type="checkbox"/> መለስተኛና ሁለተኛ ደረጃ <input type="checkbox"/> መሰናዶ<br><input type="checkbox"/> ኮሌጅ ወይም ዩኒቨርሲቲ |
| 10.  | የአባት የትምህርት ደረጃ                      | <input type="checkbox"/> መለስተኛና ሁለተኛ ደረጃ <input type="checkbox"/> መሰናዶ<br><input type="checkbox"/> ኮሌጅ ወይም ዩኒቨርሲቲ                                                                       |
| 11.  | የህጻኑ አሳዳጊ የጋብቻ ሁኔታ                   | <input type="checkbox"/> ያላባ <input type="checkbox"/> ያባ <input type="checkbox"/> ሌላ (ይገለጽ)                                                                                             |
| 12.  | የስራ ሁኔታ (የእናት)                       | <input type="checkbox"/> ተቀጣሪ <input type="checkbox"/> የራስ ተቀጣሪ<br><input type="checkbox"/> ሌላ (ይገለጽ)                                                                                   |
|      | የስራ ሁኔታ (የአባት)                       | <input type="checkbox"/> ተቀጣሪ <input type="checkbox"/> የራስ ተቀጣሪ<br><input type="checkbox"/> ሌላ (ይገለጽ)                                                                                   |
| 13.  | የቤተሰብ ወርሃዊ ገቢ (ቡብር)                  |                                                                                                                                                                                         |
| 14.  | ባለፈው ሳምንት ውስጥ ጥሬ አትክልት፣ፍራፍሬና ስጋ ልጆትን | <input type="checkbox"/> አዎ <input type="checkbox"/> አላበላሁም                                                                                                                             |

|  |          |
|--|----------|
|  | አብልተውታል? |
|--|----------|

**ሐ. ከህጻኑ በሽታ ጋር የሚያያዙ ምልክቶችና ተያያዥ ነገሮች**

| ተ.ቁ. | መጠይቆች                    | ምላሽ                                                                                                                                    |
|------|--------------------------|----------------------------------------------------------------------------------------------------------------------------------------|
| 15.  | ህመሙ የጀመረበት ጊዜ            | _____                                                                                                                                  |
| 16.  | ተቅማጡ የቆየበት ጊዜ (በቀን)      | _____                                                                                                                                  |
| 17.  | የተቅማጥ ወይም የሰገራ ድግግሞሽ በቀን | _____                                                                                                                                  |
| 18.  | የተቅማጡ ዓይነት               | <input type="checkbox"/> ውሃማ <input type="checkbox"/> ዝልግልግ <input type="checkbox"/> ደም የቀላቀለ<br><input type="checkbox"/> የላላ (ቀጠን ያለ) |
| 19.  | የህፃኑ/ኗ ውሃነስነት (ድርቀት) ሁኔታ | <input type="checkbox"/> ቀላል <input type="checkbox"/> መካከለኛ <input type="checkbox"/> አስከፊ <input type="checkbox"/> የለም                 |
| 20.  | ሌሎች የታዩ ምልክቶች            |                                                                                                                                        |
|      | ትኩሳት                     | <input type="checkbox"/> አዎ <input type="checkbox"/> የለም                                                                               |
|      | ማስታወክ                    | <input type="checkbox"/> አዎ <input type="checkbox"/> የለም                                                                               |
|      | ማቅለሽለሽ                   | <input type="checkbox"/> አዎ <input type="checkbox"/> የለም                                                                               |
|      | ውሃ የመጥማት መጨመር            | <input type="checkbox"/> አዎ <input type="checkbox"/> የለም                                                                               |
|      | የሆድ መነፋት                 | <input type="checkbox"/> አዎ <input type="checkbox"/> የለም                                                                               |
|      | ሌላ (ይገለጽ)                | _____                                                                                                                                  |
| 21.  | ከዚህ በፊት የተወሰደ መድሃኒት      | <input type="checkbox"/> አዎ <input type="checkbox"/> የለም                                                                               |
|      | ከተወሰደ መቼ?                | _____                                                                                                                                  |

**መ. ከህጻኑ ጋር ተያያዥነት ያላቸው ባህሪያትና ጤና ነክ አጋላጭ ነገሮች**

|     |                            |                                                                                                                                                      |
|-----|----------------------------|------------------------------------------------------------------------------------------------------------------------------------------------------|
| 22. | ህፃኑ/ኗ በቤት ውስጥ የሚከባከብበት ሁኔታ | <input type="checkbox"/> በቤት ሰራተኛ <input type="checkbox"/> በወላጅ እናት <input type="checkbox"/> ህጻናት መቆያ <input type="checkbox"/> ሌላ (ይጠቀስ)             |
| 23. | የአመጋገብ ሁኔታ                 | <input type="checkbox"/> የእናት ጡት ብቻ <input type="checkbox"/> የጡት ወተትና ተጨማሪ ምግብ ጋር <input type="checkbox"/> ምግብ ብቻ <input type="checkbox"/> የተዘጋጀ ወተት |
| 24. | የእናት ጡት የጠባበቅ ጊዜ           | <input type="checkbox"/> ከ1 ዓመት ያንሳል <input type="checkbox"/> 1-2 ዓመት <input type="checkbox"/> ከ2 ዓመት በላይ                                            |
| 25. | ተጨማሪ ምግብ የተጀመረበት ጊዜ        | <input type="checkbox"/> ከ6 ወር በፊት <input type="checkbox"/> 6-12 ወር <input type="checkbox"/> ከ12 ወር በላይ                                              |

|     |                                        |                                                                                                                                                                                                        |
|-----|----------------------------------------|--------------------------------------------------------------------------------------------------------------------------------------------------------------------------------------------------------|
| 26. | ልጅን የሚመግቡበት መንገድ ምድን ነው?               | <input type="checkbox"/> በእጅ <input type="checkbox"/> በሳህን ወይም በማንኪያ <input type="checkbox"/> በጡጦ                                                                                                      |
| 27. | እጅን መቼና ምን ጊዜ ይታጠባሉ?                   | <input type="checkbox"/> ከምግብ ዝግጅት በፊት <input type="checkbox"/> ልጅን ከመመገብ በፊትና ኋላ<br><input type="checkbox"/> ከሽንት ቤት በኋላ <input type="checkbox"/> ልጁን ካጸዳሁ (ካካ) በኋላ                                   |
| 28. | እጅን ለመታጠብ ምን ይጠቀማሉ?                    | <input type="checkbox"/> ሳሙና <input type="checkbox"/> ውሃ ብቻ <input type="checkbox"/> ሌላ-----                                                                                                           |
| 29. | ህጻኑ በራሱ ይመገባል?                         | <input type="checkbox"/> ይመገባል <input type="checkbox"/> አይመገብም                                                                                                                                         |
| 30. | ህጻኑ እጁን/ጁን ከምግብ በፊት ይታጠባል?             | <input type="checkbox"/> ይታጠባል <input type="checkbox"/> አይታጠብም                                                                                                                                         |
| 31. | ህጻኑ እነዴት ይጸዳዳል?                        | <input type="checkbox"/> በዳይፐር <input type="checkbox"/> ሽንት ቤት <input type="checkbox"/> ፖፖ <input type="checkbox"/> ወለሉ ላይ<br><input type="checkbox"/> በልብስ ላይ <input type="checkbox"/> ሌላ (ጥቀስ) ----- |
| 32. | የህኑን ሰገራ እንዴት ነው የሚያስወግዱት?             | <input type="checkbox"/> ህጻኑ ሽንት ቤት ይጠቀማል <input type="checkbox"/> ሽንት ቤት<br><input type="checkbox"/> ቆሻሻ ማጠራቀሚያ ላይ <input type="checkbox"/> ውጭ (መስክ) ይጣላል                                             |
| 33. | ህኑን ያጸዳበትን ወሃ የሚያስወግዱበት የት ነው?         | <input type="checkbox"/> ሽንት ቤት <input type="checkbox"/> መስክ <input type="checkbox"/> ቆሻሻ ማጠራቀሚያ<br><input type="checkbox"/> በውሃ አይጸዳዳም                                                                |
| 34. | ህጻኑ የተከተበው የክትባት ዓይነት?                 | <input type="checkbox"/> ኩፍኝ <input type="checkbox"/> ሮታ <input type="checkbox"/> ሌላ (ይጠቀስ)                                                                                                            |
| 35. | ኑትሪሽናል (ውፍረቱ) ደረጃው                     | <input type="checkbox"/> ዝቅተኛ <input type="checkbox"/> ጤናማ <input type="checkbox"/> ከፍተኛ                                                                                                               |
| 36. | ባለፉት 2 ሳምንታት የጉዞ ታሪክ ያለው የቤተሰብ አባል አለ? | <input type="checkbox"/> አለ <input type="checkbox"/> የለም <input type="checkbox"/> ካለ መቼ?____ የት?____                                                                                                   |

**ሠ. አካባቢያዊ አጋላጭ ነገሮች**

|     |                            |                                                                                                                                                    |
|-----|----------------------------|----------------------------------------------------------------------------------------------------------------------------------------------------|
| 37. | የቤት ባለቤትነት                 | <input type="checkbox"/> የግል <input type="checkbox"/> ኪራይ <input type="checkbox"/> ሌላ (ይጠቀስ)                                                       |
| 38. | ለብቻ ማድ ቤት አለ?              | <input type="checkbox"/> አዎ <input type="checkbox"/> የለም                                                                                           |
| 39. | የሽንትቤት አጠቃቀም ሁኔታ           | <input type="checkbox"/> በጋራ <input type="checkbox"/> የግል <input type="checkbox"/> የህዝብ                                                            |
| 40. | የሚጠቀሙት የሽንት ቤት ዓይነት        | <input type="checkbox"/> ዘመናዊ (ሴራሚክ) <input type="checkbox"/> ባህላዊ (ጉድጓድ ብቻ)<br><input type="checkbox"/> መስክ ላይ <input type="checkbox"/> ሌላ (ይጠቀስ) |
| 41. | የጅ መታጠቢያ በሽንት ቤት አቅራቢያ አለ? | <input type="checkbox"/> አለ <input type="checkbox"/> የለም                                                                                           |



|     |                                                     |                                                                                                                                                                                              |
|-----|-----------------------------------------------------|----------------------------------------------------------------------------------------------------------------------------------------------------------------------------------------------|
| 42. | ሽንትቤቱ ምን ያክል ጊዜ ይጸዳል?                               | <input type="checkbox"/> በሚቆሽሽ ጊዜ <input type="checkbox"/> በየ ቀኑ <input type="checkbox"/> ሁለት ጊዜ በሳምንት<br><input type="checkbox"/> አይጸዳም                                                     |
| 43. | ቆሻሻ ማጠራቀሚያ የሚቀመጥበት ቦታ የት ነው?                        | <input type="checkbox"/> ግቢ ውስጥ <input type="checkbox"/> ከግቢ ውጭ <input type="checkbox"/> ማጠራቀሚያ የለም                                                                                          |
| 44. | የቆሻሻ ማጠራቀሚያው ተገቢ ክዳን አለው?                           | <input type="checkbox"/> አለው <input type="checkbox"/> ለውም                                                                                                                                    |
| 45. | የቆሻሻ ማጠራቀሚያ ከሌሎች ቆሻሻውን እንዴት ያሰወግዳሉ?                 | <input type="checkbox"/> ማቃጠል <input type="checkbox"/> መቅበር <input type="checkbox"/> መስክ ላይ ማፍሰስ <input type="checkbox"/> ሌላ (ይጠቀስ)                                                          |
| 46. | ቆሻሻ አስወጋጆች በምን ያክል ጊዜ ቆሻሻን ይሰበስባሉ?                  | <input type="checkbox"/> በየቀኑ <input type="checkbox"/> በየሳምንቱ <input type="checkbox"/> በየወሩ <input type="checkbox"/> የሚሰበስብ የለም                                                              |
| 47. | የቤት እንስሳት በግቢ ወስጥ አለ?                               | <input type="checkbox"/> አለ <input type="checkbox"/> የለም                                                                                                                                     |
| 48. | ካለ ምን ዓይነት እንስሳት ነው?                                | <input type="checkbox"/> ከብት <input type="checkbox"/> ፍየል <input type="checkbox"/> ውሻ <input type="checkbox"/> ዶሮ <input type="checkbox"/> ሌላ (ይጠቀስ)                                         |
| 49. | የመጠጥ ውሃ ምንጭ                                         | <input type="checkbox"/> ሷሸ ውሃ <input type="checkbox"/> እሽግ ውሃ <input type="checkbox"/> ሌላ (ትቀስ)                                                                                             |
| 50. | የውሃው ምንጭ አቅርቦት እንዴት ነው?                             | <input type="checkbox"/> ለሰዓታት ይቋረጣል <input type="checkbox"/> ለቀናት ይቋረጣል<br><input type="checkbox"/> ለሳምንት ይቋረጣል <input type="checkbox"/> ከሳምንት በላይ ይቋረጣል<br><input type="checkbox"/> አይቋረጥም |
| 51. | ውሃ በምን ያክማሉ?                                        | <input type="checkbox"/> ማጣራት <input type="checkbox"/> ማፍላት <input type="checkbox"/> የለም <input type="checkbox"/> ሌላ (ይጠቀስ)                                                                  |
| 52. | ውሃን በምን ዓይነት ዕቃ ያስቀምጣሉ?                             | <input type="checkbox"/> ክዳን ባለው <input type="checkbox"/> ክዳን በሌለው                                                                                                                           |
| 53. | የውሃ ማጠራቀሚያ ዕቃውን በአድስ ውሃ ለመተካት ሁልጊዜ በማጠብ ባዶውን ይቀመጣል? | <input type="checkbox"/> አወ <input type="checkbox"/> አይደለም                                                                                                                                   |

የመረጃ ሰብሳቢ ስም \_\_\_\_\_ ፊርማ \_\_\_\_\_ ቀን \_\_\_\_\_

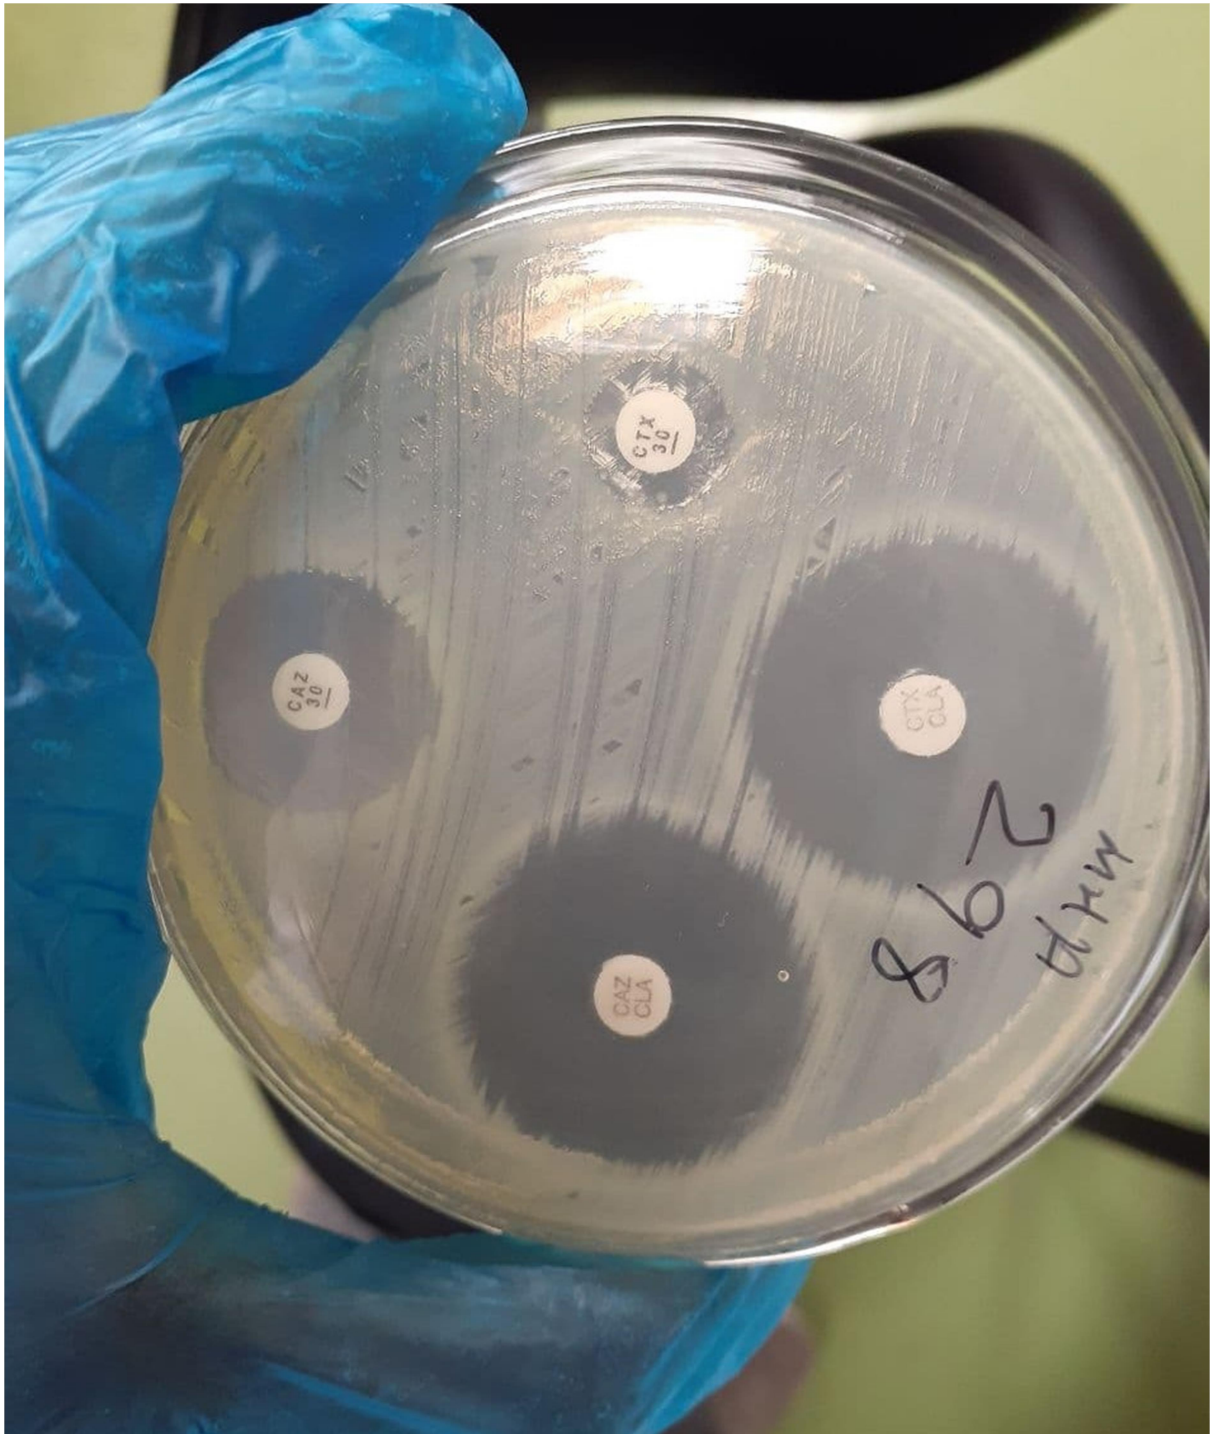

**S1 Figure.** Extended spectrum  $\beta$  lactamase (ESBL) positive strain done using combination disk method. The result shows a  $\geq 5$ mm increase in a zone diameter for either antimicrobial agent tested in combination (CAZ\_CLA=Ceftazidime clavulanate, and CTX\_CLA=Cefotaxime clavulanate) versus the zone diameter of the agent when tested alone (CAZ=Ceftazidime, and CTX=Cefotaxime).

**S1 Table.**  $\beta$ -lactamase genes detected in MDR and ESBL-producing DEC pathotype isolated from under-five children in Addis Ababa and Debre Berhan, Ethiopia.

| Isolate ID | Pathotype | $\beta$ -lactamase genes    |                           |                           |                           |                              | Study area |
|------------|-----------|-----------------------------|---------------------------|---------------------------|---------------------------|------------------------------|------------|
|            |           | <i>bla</i> <sub>CTX-M</sub> | <i>bla</i> <sub>TEM</sub> | <i>bla</i> <sub>SHV</sub> | <i>bla</i> <sub>NDM</sub> | <i>bla</i> <sub>OXA-48</sub> |            |
| ET-1       | ETEC      | +                           | +                         | +                         | +                         | +                            | AA         |
| ET-2       | ETEC      | +                           | +                         | -                         | +                         | +                            |            |
| ET-3       | ETEC      | -                           | +                         | -                         | -                         | -                            |            |
| ET-4       | ETEC      | +                           | +                         | -                         | -                         | -                            |            |
| ET-5       | ETEC      | +                           | +                         | +                         | -                         | -                            | DB         |
| ET-6       | ETEC      | +                           | -                         | -                         | -                         | -                            |            |
| EA-1       | EAEC      | +                           | +                         | -                         | -                         | -                            | AA         |
| EA-2       | EAEC      | +                           | +                         | +                         | -                         | -                            |            |
| EA-3       | EAEC      | -                           | +                         | +                         | -                         | -                            |            |
| EA-4       | EAEC      | +                           | +                         | +                         | -                         | -                            |            |
| EA-5       | EAEC      | +                           | +                         | -                         | -                         | -                            | DB         |
| EA-6       | EAEC      | +                           | +                         | +                         | -                         | -                            |            |
| EA-7       | EAEC      | +                           | -                         | +                         | -                         | -                            | AA         |
| EA-8       | EAEC      | +                           | -                         | +                         | -                         | -                            | DB         |
| EA-9       | EAEC      | +                           | +                         | +                         | -                         | -                            | AA         |
| EA-10      | EAEC      | +                           | +                         | +                         | -                         | -                            |            |
| EA-11      | EAEC      | +                           | +                         | +                         | -                         | -                            |            |
| EA-12      | EAEC      | +                           | -                         | -                         | +                         | +                            |            |
| EA-13      | EAEC      | +                           | +                         | -                         | -                         | -                            | DB         |
| EA-14      | EAEC      | -                           | +                         | +                         | +                         | +                            | AA         |
| EA-15      | EAEC      | +                           | +                         | -                         | -                         | -                            |            |
| EP-1       | EPEC      | -                           | +                         | -                         | -                         | -                            | AA         |
| EP-2       | EPEC      | -                           | +                         | -                         | -                         | -                            | DB         |

|      |        |   |   |   |   |   |    |
|------|--------|---|---|---|---|---|----|
| EP-3 | EPEC   | - | + | + | - | - | AA |
| EI-1 | EIEC   | - | + | + | - | - | AA |
| EI-2 | EIEC   | - | + | + | - | - | DB |
| ST-1 | STEC   | + | - | - | - | - | DB |
| ST-2 | STEC   | + | + | + | - | - | AA |
| ST-3 | STEC   | + | + | + | - | - | DB |
| HB-1 | Hybrid | + | - | + | - | - | AA |

Abbreviations: EPEC=Enteropathogenic Escherichia coli, ETEC= Enterotoxigenic Escherichia coli, EIEC= Enteroinvasive Escherichia coli, EAEC=Enteroaggregative Escherichia coli, STEC= Shiga-toxin producing Escherichia coli, DEAE=Diffusely adherent Escherichia coli, AA=Addis Ababa, DB=Debre Berhan

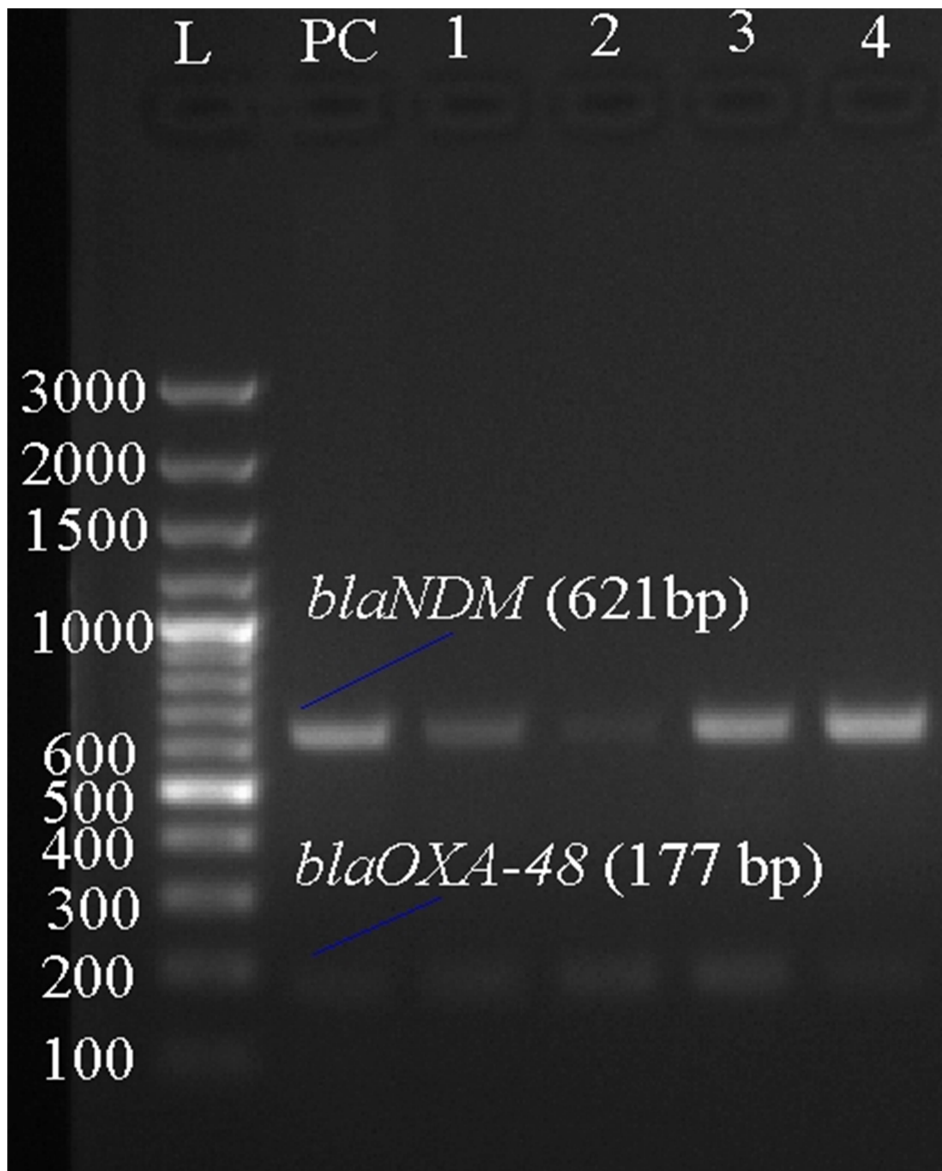

**S2 Figure.** Gel image of the carbapenemase genes detected in DEC pathotypes isolated from under-five children, Addis Ababa and Debre Berhan, Ethiopia 2020/21. Notes: Lane L, 100 kb+ DNA ladder; 1 = positive control [*bla*<sub>NDM</sub> (621bp), and *bla*<sub>OXA-48</sub> (177 bp)]; Lanes 1–4 are positive for *bla*<sub>NDM</sub> and *bla*<sub>OXA-48</sub>.
